# Supplementary material for: Metal–organic framework derived leaf-like CoSNC nanocomposites for supercapacitor electrodes
Source: Royal Society of Chemistry journal article supplement (doi:10.1039/c8nr04780d), 2018-01-01
Supplement: c8nr04780d1.pdf [file c8nr04780d1.pdf]

## Supporting Information

# **Metal-Organic Frameworks Derived Leaf-like CoSNC Nanocomposites for Supercapacitor Electrodes**

*Yu Wang,<sup>a</sup> Qinjie Du,<sup>a</sup> Haimin Zhao,<sup>b</sup> Shanshan Hou,<sup>a</sup> Yu Shen,<sup>a</sup> Hongfeng Li,<sup>a</sup> Xueying Kong,<sup>a</sup> Wei Sun,<sup>b</sup> Bo Zhang,<sup>a</sup> Sheng Li,<sup>a</sup> Fengwei Huo<sup>\*a</sup> and Weina Zhang<sup>\*a</sup>*

<sup>a</sup>Key Laboratory of Flexible Electronics (KLOFE) & Institute of Advanced Materials (IAM), Nanjing Tech University (NanjingTech), 30 South Puzhu Road, Nanjing 211816, P.R. China. E-mail: iamwnzhang@njtech.edu.cn E-mail: iamfwhuo@njtech.edu.cn.

<sup>b</sup>Zhejiang Tianneng Energy Technology Co., Ltd, 18 Baoqiao Road, Huaxi Industrial Function Zone, Huzhou 313100, P.R. China.

\* Corresponding authors: [iamfwhuo@njtech.edu.cn](mailto:iamfwhuo@njtech.edu.cn) (F. Huo); [iamwnzhang@njtech.edu.cn](mailto:iamwnzhang@njtech.edu.cn) (W. Zhang)

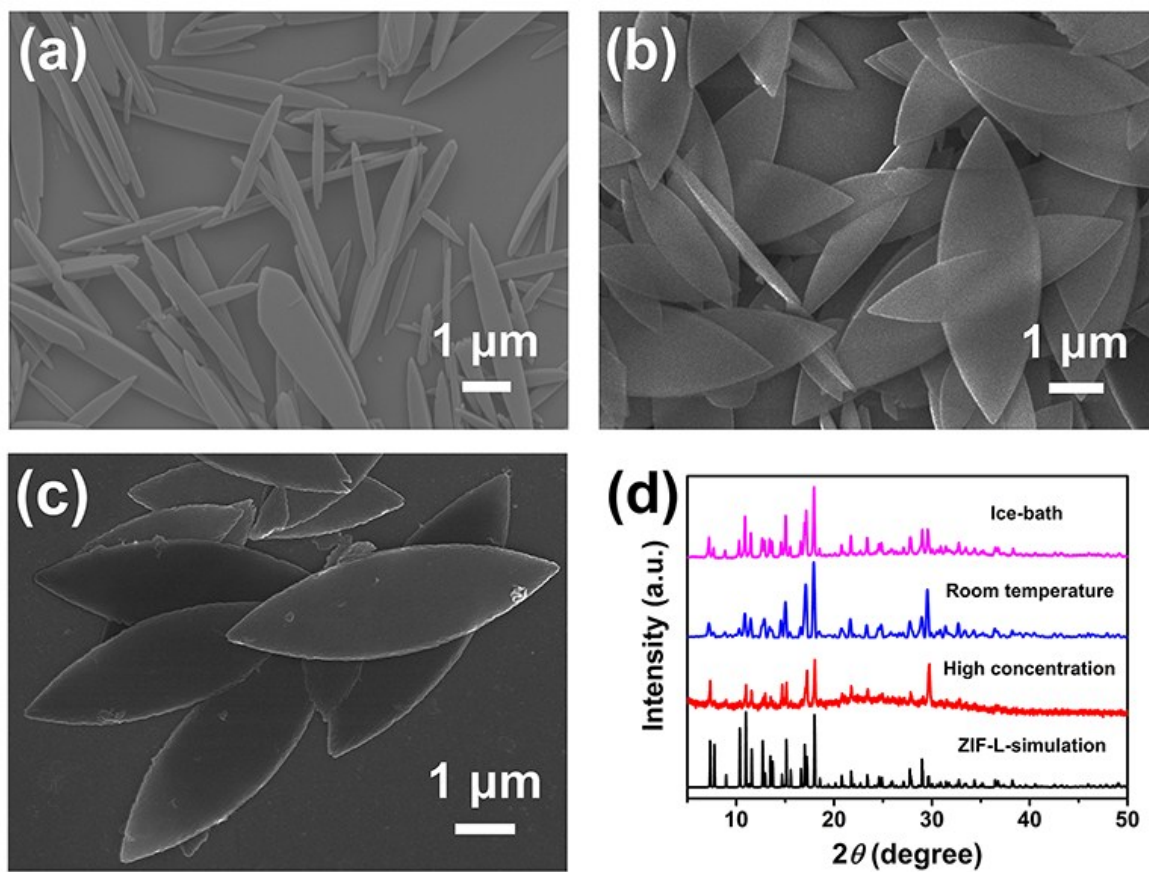

**Fig. S1** SEM images of ZIF-L-Co with different morphologies: (a) High concentration. (b) Room temperature. (c) Ice-bath and (d) XRD patterns of ZIF-L-Co with different morphologies under various conditions.

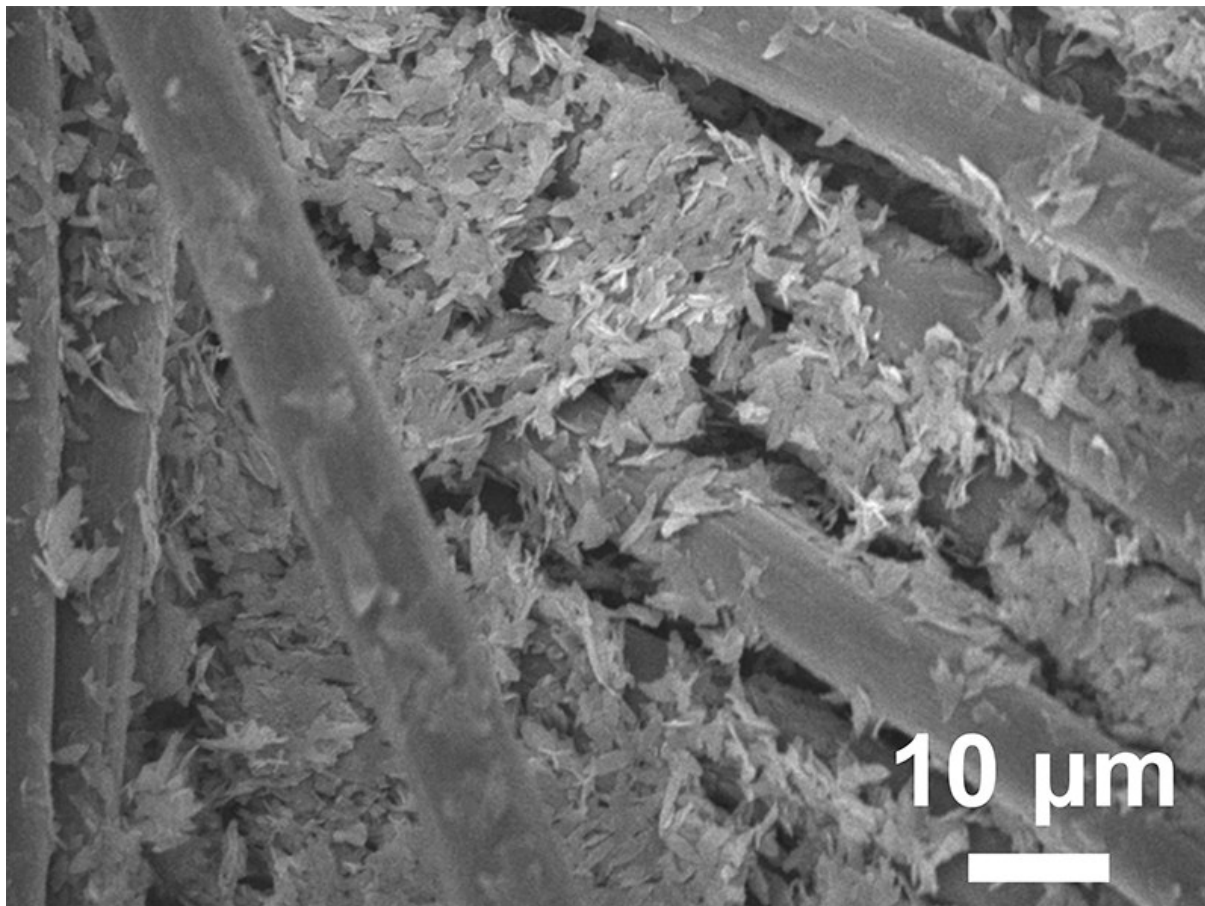

**Fig. S2** SEM image of the leaf-like CoSNC nanocomposites on carbon cloth.

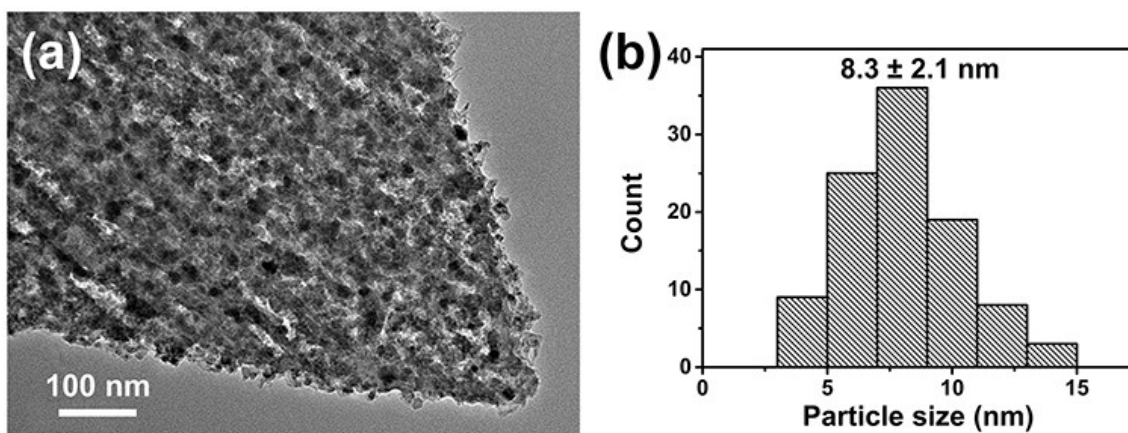

**Fig. S3** (a) TEM image of leaf-like CoSNC nanocomposites. (b) Size distribution histogram of CoS<sub>2</sub> nanoparticles in leaf-like CoSNC nanocomposites.

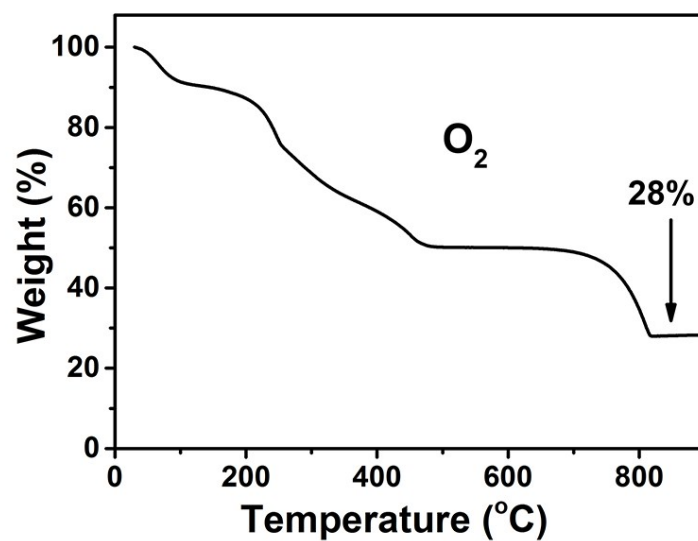

Fig. S4 TGA curve of the leaf-like CoSNC nanocomposites measured in  $O_2$ .

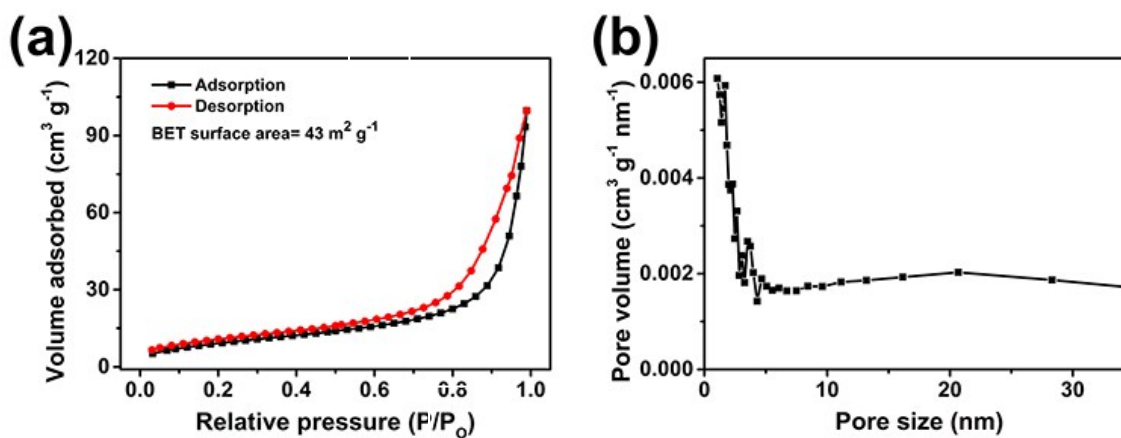

Fig. S5 (a)  $N_2$  sorption isotherms and (b) Pore-size distribution of the leaf-like CoSNC nanocomposites.

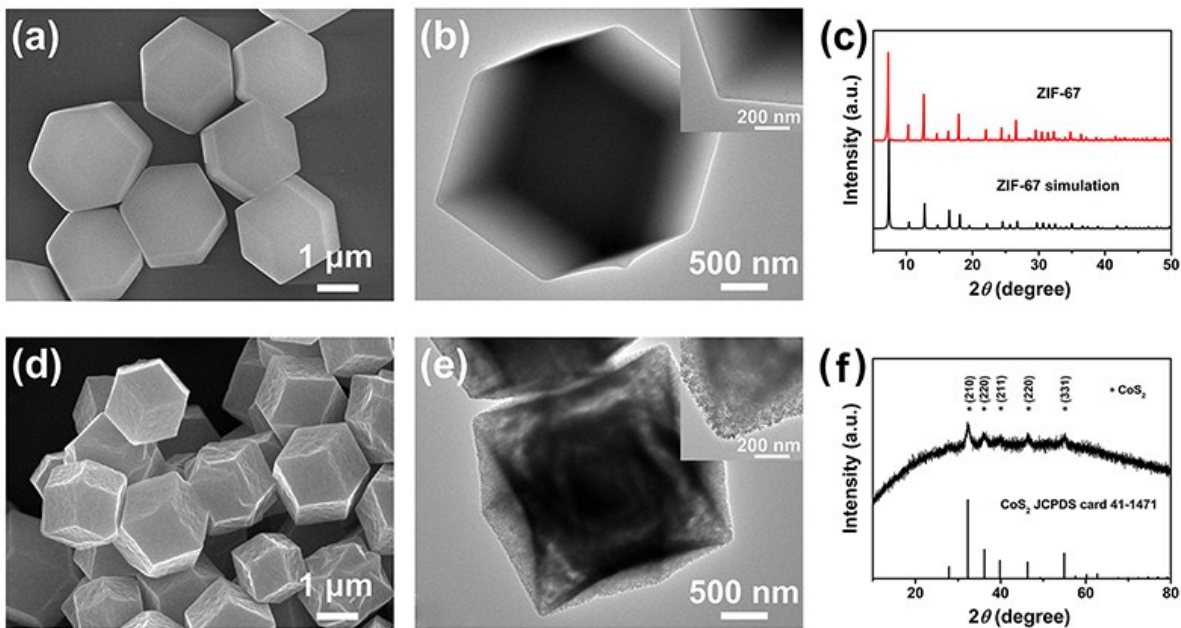

**Fig. S6** (a) SEM image of ZIF-67. (b) TEM image of ZIF-67. Top inset: enlarged image of the edge. (c) XRD pattern of ZIF-67. (d) SEM image of dodecahedral-like CoSNC nanocomposites. (e) TEM image of dodecahedral-like CoSNC nanocomposites. Top inset: enlarged image of the edge. (f) XRD pattern of dodecahedral-like CoSNC nanocomposites.

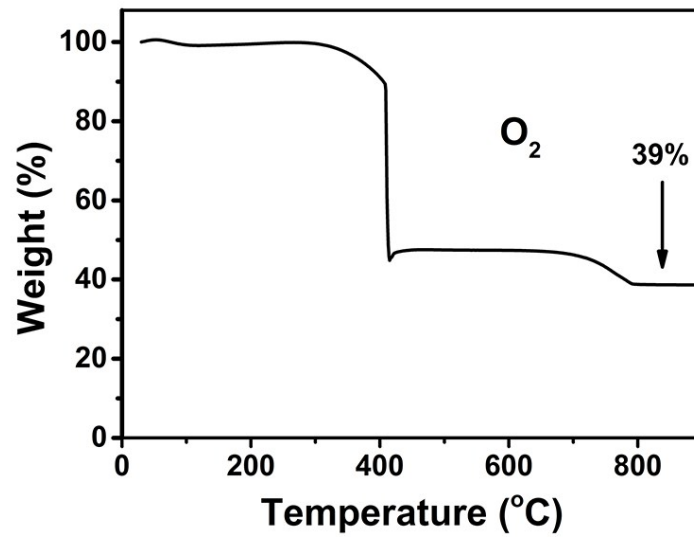

**Fig. S7** TGA curve of dodecahedral-like CoSNC nanocomposites measured in  $O_2$ .

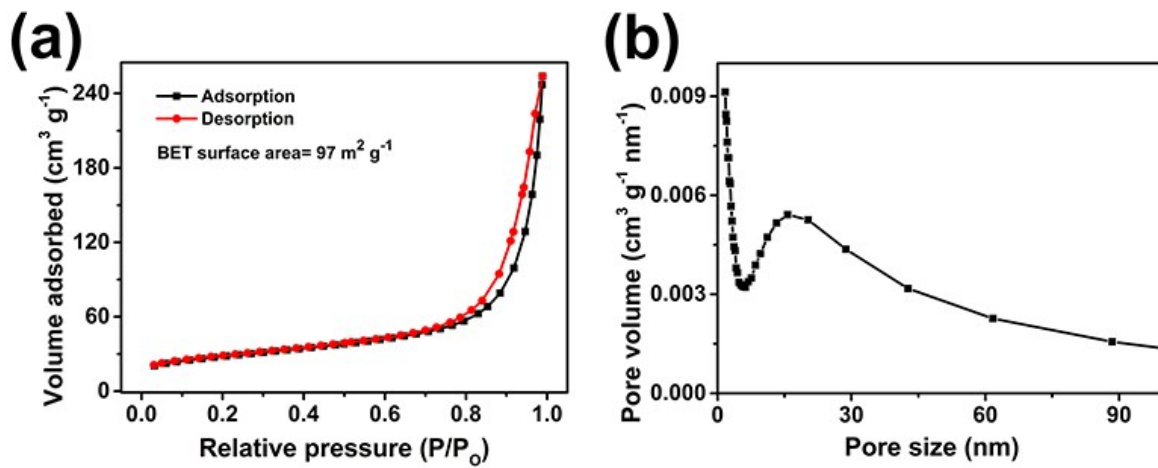

**Fig. S8** (a)  $N_2$  sorption isotherms and (b) Pore-size distribution of dodecahedral-like CoSNC nanocomposites.

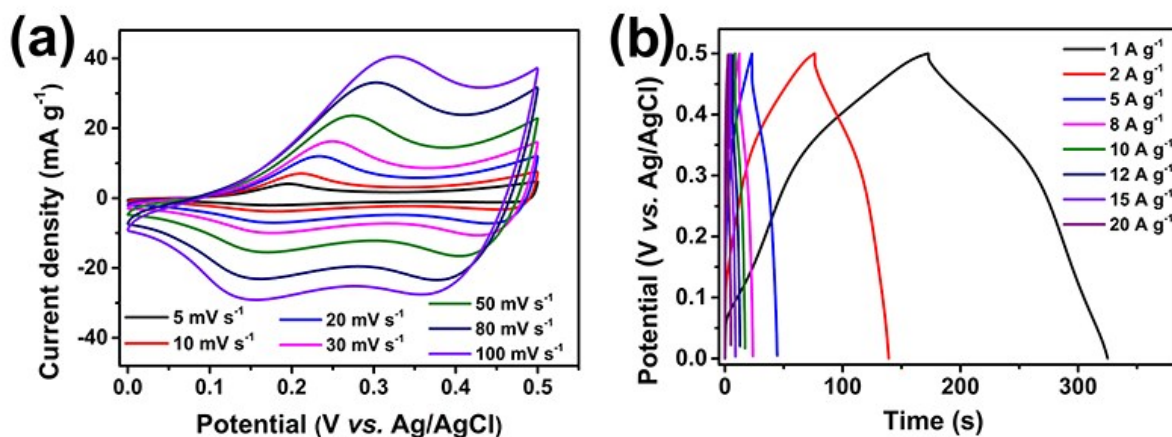

**Fig. S9** (a) CV curves at different scan rates from 5 to 100  $\text{mV s}^{-1}$  and (b) Charge/discharge curves at various current densities from 1 to 20  $\text{A g}^{-1}$  of dodecahedral-like CoSNC nanocomposites electrode.

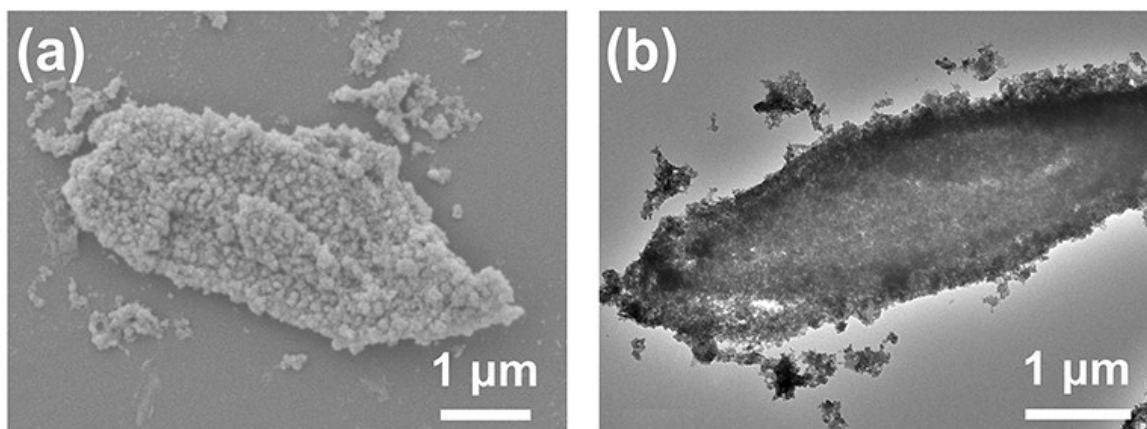

**Fig. S10** (a) SEM image and (b) TEM image of the leaf-like CoSNC nanocomposites after 10,000 cycles at a current density of 10  $\text{A g}^{-1}$ .

**Table S1.** Comparison of supercapacitor performances of MOF-derived carbon, MOF-derived carbon/metal sulfide and cobalt-based materials.

| Electrode materials                                                                         | Electrolytes | Maximum $C_S$                                   | Rate performances                                                                                  | Cycling performances                                                 | References |
|---------------------------------------------------------------------------------------------|--------------|-------------------------------------------------|----------------------------------------------------------------------------------------------------|----------------------------------------------------------------------|------------|
| 1) Leaf-like CoSNC nanocomposites derived from ZIF-L-Co (48.2 wt.% of CoS <sub>2</sub> )    | 2 M KOH      | 383 F g <sup>-1</sup> at 1.0 A g <sup>-1</sup>  | $C_S$ retention of 72.3% at 10 A g <sup>-1</sup><br>$C_S$ retention of 59% at 20 A g <sup>-1</sup> | $C_S$ retention of 91% at 10 A g <sup>-1</sup> after 10,000 cycles   | This work  |
| 2) 3D interconnected porous carbons derived from MOF-5                                      | 6 M KOH      | 212 F g <sup>-1</sup> at 0.05 A g <sup>-1</sup> | $C_S$ retention of 82.5% at 20 A g <sup>-1</sup>                                                   | $C_S$ retention of 95.9% after 1,000 cycles                          | Ref. S1    |
| 3) Hierarchically flower-like N-doped porous carbon derived from Cu-MOF                     | 6 M KOH      | 149 F g <sup>-1</sup> at 0.5 A g <sup>-1</sup>  | $C_S$ retention of 70.5% at 10 A g <sup>-1</sup>                                                   | $C_S$ retention of 86.8% at 1.0 A g <sup>-1</sup> after 2,000 cycles | Ref. S2    |
| 4) 2D CoSNC nanocomposites derived from PPF-3 nanosheets (21 wt.% of CoS <sub>1.097</sub> ) | 2M KOH       | 360 F g <sup>-1</sup> at 1.5 A g <sup>-1</sup>  | $C_S$ retention of 56.8% at 30 A g <sup>-1</sup>                                                   | $C_S$ retention of 90% at 12 A g <sup>-1</sup> after 2,000 cycles    | Ref. S3    |
| 5) Cu <sub>1.96</sub> S-C polyhedra derived from HKUST-1 (74 wt.% of Cu <sub>1.96</sub> S)  | 2M KOH       | 200 F g <sup>-1</sup> at 0.5 A g <sup>-1</sup>  | $C_S$ retention of 60% at 2.0 A g <sup>-1</sup>                                                    | $C_S$ retention of 80% at 50 mV s <sup>-1</sup> after 3,000 cycles   | Ref. S4    |
| 6) CoS polyhedral nanocages derived from ZIF-67                                             | 1M KOH       | 1476 F g <sup>-1</sup> at 1.0 A g <sup>-1</sup> | $C_S$ retention of 63% at 10 A g <sup>-1</sup>                                                     | $C_S$ retention of 88.2% at 10 A g <sup>-1</sup> after 2,000 cycles  | Ref. S5    |
| 7) 2D CoS sheets                                                                            | 2M KOH       | 1314 F g <sup>-1</sup> at 1.0 A g <sup>-1</sup> | $C_S$ retention of 54.4% at 20 A g <sup>-1</sup>                                                   | $C_S$ retention of 91.7% at 3.0 A g <sup>-1</sup> after 500 cycles   | Ref.S6     |
| 8) 3D flower-like                                                                           | 6M KOH       | 522 F g <sup>-1</sup> at                        | $C_S$ retention of                                                                                 | $C_S$ retention of 97.7% at 1.0 A                                    | Ref. S7    |



|                                |        |                                                |                                                         |                                                                             |         |
|--------------------------------|--------|------------------------------------------------|---------------------------------------------------------|-----------------------------------------------------------------------------|---------|
| Co <sub>9</sub> S <sub>8</sub> |        | 0.5 A g <sup>-1</sup>                          | 76% at 2.0 A g <sup>-1</sup>                            | g <sup>-1</sup> after 1,000 cycles                                          |         |
| 9) 3D flower-like CoS          | 6M KOH | 586 F g <sup>-1</sup> at 1.0 A g <sup>-1</sup> | C <sub>S</sub> retention of 89% at 10 A g <sup>-1</sup> | C <sub>S</sub> retention of 91% at 1.0 A g <sup>-1</sup> after 1,000 cycles | Ref. S8 |

---

- [S1] M. X. Yu, L. Zhang, X. J. He, H. H. Yu, J. F. Han and M. B. Wu, *Mater. Lett.*, 2016, **172**, 81-84.
- [S2] Z. X. Li, K. Y. Zou, X. Zhang, T. Han and Y. Yang, *Inorg. Chem.*, 2016, **55**, 6552-6562.
- [S3] F. F. Cao, M. T. Zhao, Y. F. Yu, B. Chen, Y. Huang, J. Yang, X. H. Cao, Q. P. Lu, X. Zhang, Z. C. Zhang, C. L. Tan and H. Zhang, *J. Am. Chem. Soc.*, 2016, **138**, 6924-6927.
- [S4] R. B. Wu, D. P. Wang, V. Kumar, K. Zhou, A. W. K. Law, P. S. Lee, J. Lou and Z. Chen, *Chem. Commun.*, 2015, **51**, 3109-3112.
- [S5] Z. Jiang, W. J. Lu, Z. P. Li, K. H. Ho, X. Li, X. L. Jiao and D. R. Chen, *J. Mater. Chem. A*, 2014, **2**, 8603-8606.
- [S6] K. J. Huang, J. Z. Zhang, G. W. Shi and Y. M. Liu, *Mater. Lett.*, 2014, **131**, 45-48.
- [S7] F. L. Luo, J. Li, H. Y. Yuan and D. Xiao, *Electrochim. Acta.*, 2014, **123**, 183-189.
- [S8] L. Yin, L. Q. Wang, X. H. Liu, Y. S. Gai, L. H. Su, B. H. Qu and L. Y. Gong, *Eur. J. Inorg. Chem.*, 2015, **14**, 2457-2462.
